# Supplementary material
Source: publisher figshare collection journal article supplement (https://acs.figshare.com/ndownloader/files/15627287)
Supplement: Supplementary file 1 [file 15627287]

## **Supporting Information**

### **A superhydrophilic, underwater superoleophobic and highly stretchable humidity and chemical vapor sensor for human breath detection**

Xuewu Huang <sup>a</sup>, Bei Li <sup>a</sup>, Ling Wang <sup>a</sup>, Xuejun Lai <sup>b</sup>, Huaiguo Xue <sup>a</sup>, Jiefeng Gao<sup>\*a,c</sup>

<sup>a</sup> School of Chemistry and Chemical Engineering, Yangzhou University, Yangzhou, Jiangsu, 225002, China

<sup>b</sup> College of Materials Science and Engineering, Key Lab of Guangdong Province for High Property and Functional Polymer Materials, South China University of Technology, Guangzhou 510641, P. R. China.

<sup>c</sup> State Key Laboratory of Polymer Materials Engineering Sichuan University, Chengdu, Sichuan 610065, P. R. China

\*Corresponding authors: jfgao@yzu.edu.cn;

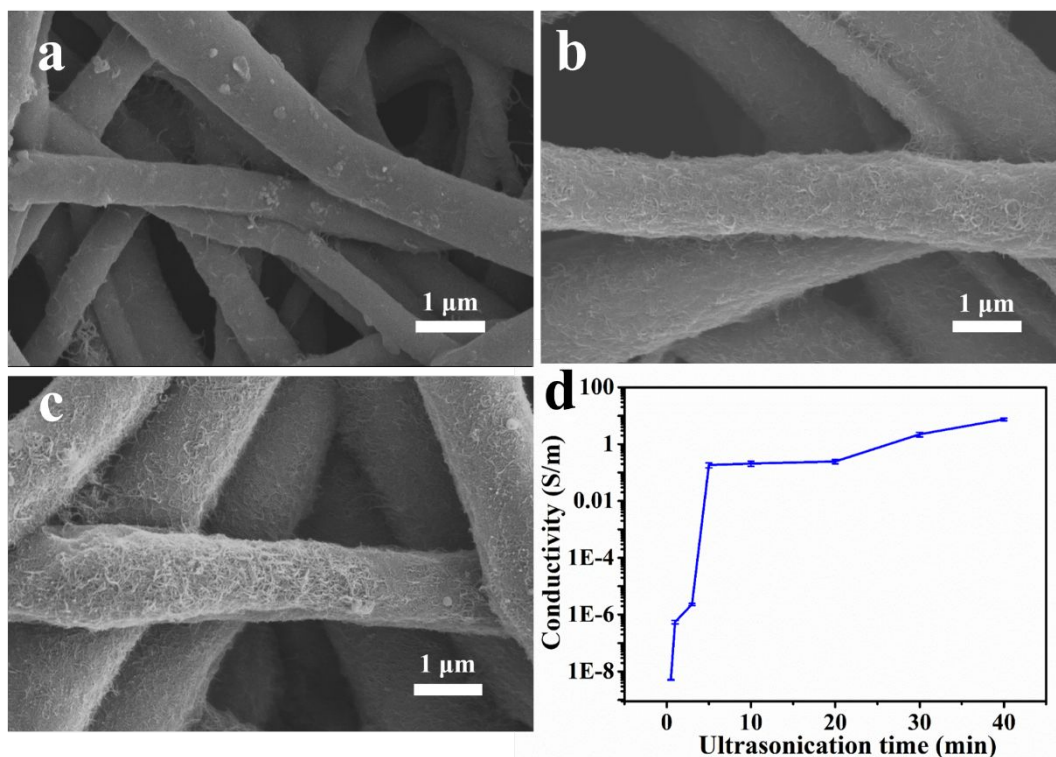

**Figure S1.** The SEM images of (a) CNC-0.5; (b) CNC-5; (c) CNC-40; (d) Electrical conductivity of CNC as the ultrasonication time.

**Table S1.** Results of mechanical properties of different nanofiber mat.

| Sample                | Young modulus | Tensile strength | Elongation |
|-----------------------|---------------|------------------|------------|
|                       | (MPa)         | (MPa)            | (%)        |
| Pure PU nanofiber mat | 1.72          | 8.05             | 455        |
| CNC-10                | 2.55          | 10.41            | 405        |
| CNC-30                | 2.14          | 9.00             | 416        |

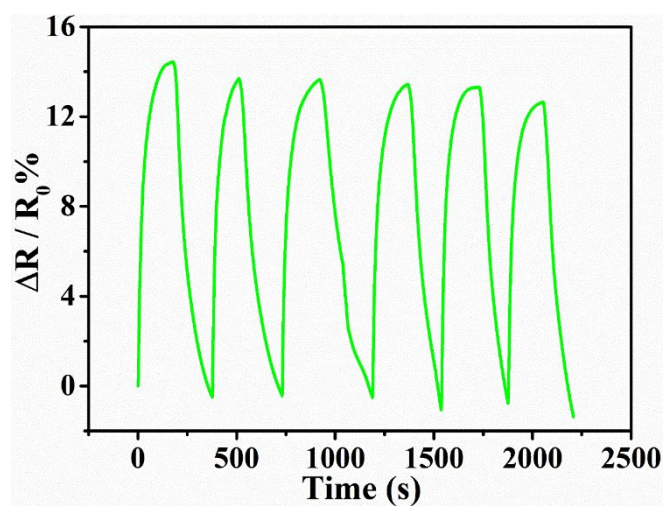

**Figure. S2** Humidity sensing property after 100 cycles of uniaxial strain in 59% RH environment, the strain and strain rate were fixed at 50%, 30 mm min<sup>-1</sup>, respectively.

**Table S2.** Physical properties of the polymer or solvents. Note that the saturated vapor pressure was measured at 21°C, the relative value was referred to “*Handbook of Organic Solvent Properties*” [I. M. Smallwood, Arnold, London, 1996.]

| Parameters<br><br>Polymer or<br>solvents |                                                                 |                                        |                            |
|------------------------------------------|-----------------------------------------------------------------|----------------------------------------|----------------------------|
|                                          | Solubility parameters<br>(J <sup>1/2</sup> cm <sup>-3/2</sup> ) | Molar volume<br>(L mol <sup>-1</sup> ) | Vapor<br>pressure<br>(kPa) |
| PU                                       | 20.5                                                            | -                                      | -                          |
| Heptane                                  | 15.2                                                            | 147.5                                  | 5.3                        |
| Acetone                                  | 20.5                                                            | 73.4                                   | 25.9                       |
| Toluene                                  | 18.2                                                            | 106.8                                  | 3.1                        |
| THF                                      | 20.5                                                            | 81.1                                   | 17.7                       |
| Methanol                                 | 29.7                                                            | 40.4                                   | 13.7                       |
